# Supplementary material for: Donor–acceptor cocrystal based on hexakis(alkoxy)triphenylene and perylenediimide derivatives with an ambipolar transporting property
Source: Royal Society of Chemistry journal article supplement (doi:10.1039/c4nr05915h), 2014-12-08
Supplement: c4nr05915h1.pdf [file c4nr05915h1.pdf]

## Supporting Information

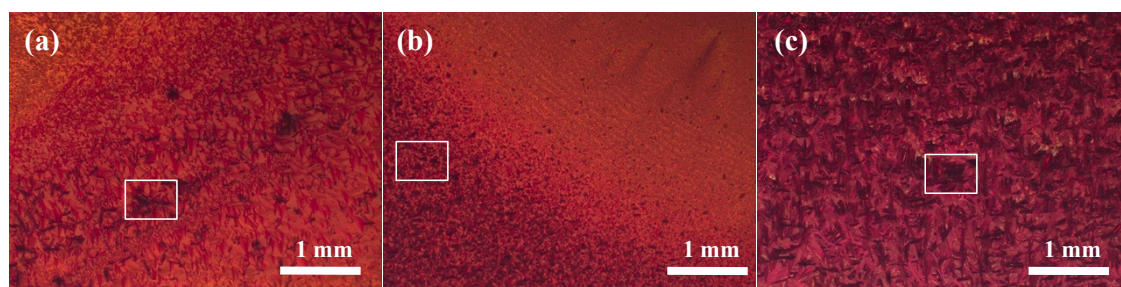

**Figure S1:** POM images of drop-cast H6TP/EP-PDI films with ratios of (a) 1/2, (b) 1/3 and (c) 1/4, respectively. Chloroform was used as the solvent and the concentration was all 5 mg/ml. The needle-like crystals in the white boxes were EP-PDI.

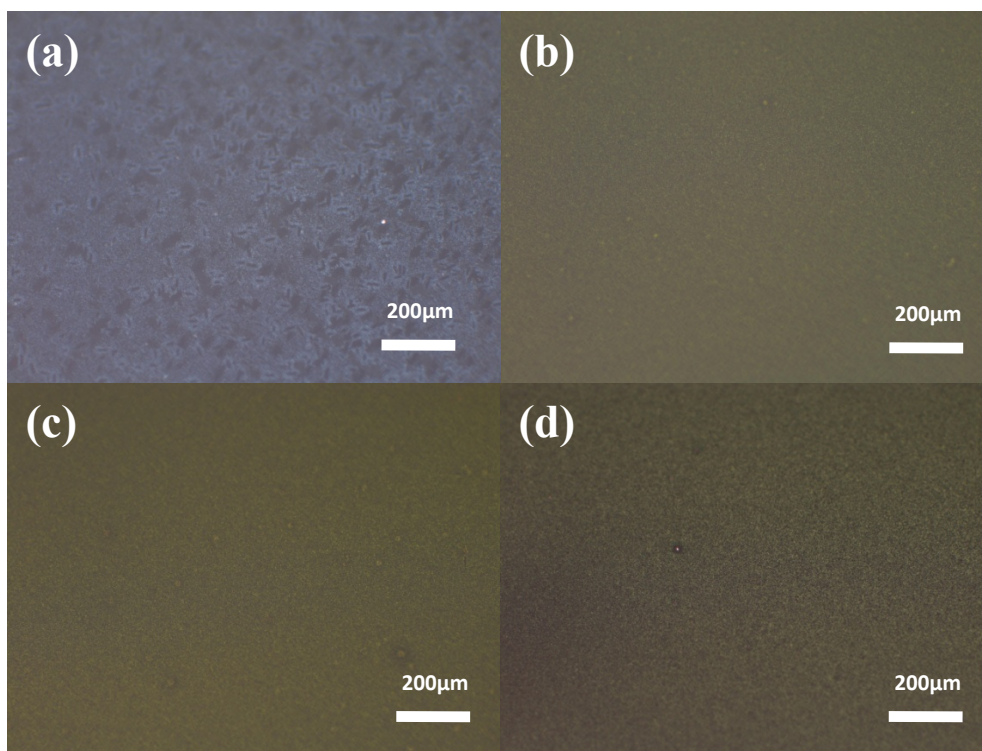

**Figure S2:** POM images of spin-coated H6TP/EP-PDI films from the chloroform solutions with ratios of (a) 1/0, (b) 2/1, (c) 1/1 and (d) 0/1, respectively.

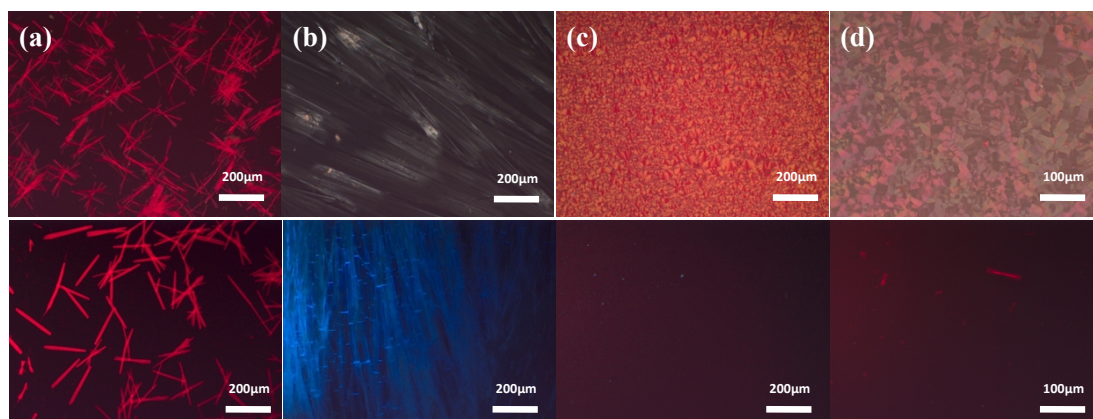

**Figure S3:** POM images of drop-cast H6TP/EP-PDI films using chlorobenzene as the solvent. H6TP/EP-PDI ratios were (a) 0/1, (b) 1/0, (c) 1/1 and (d) 2/1, respectively. The corresponding fluorescence microscopy images were shown below.

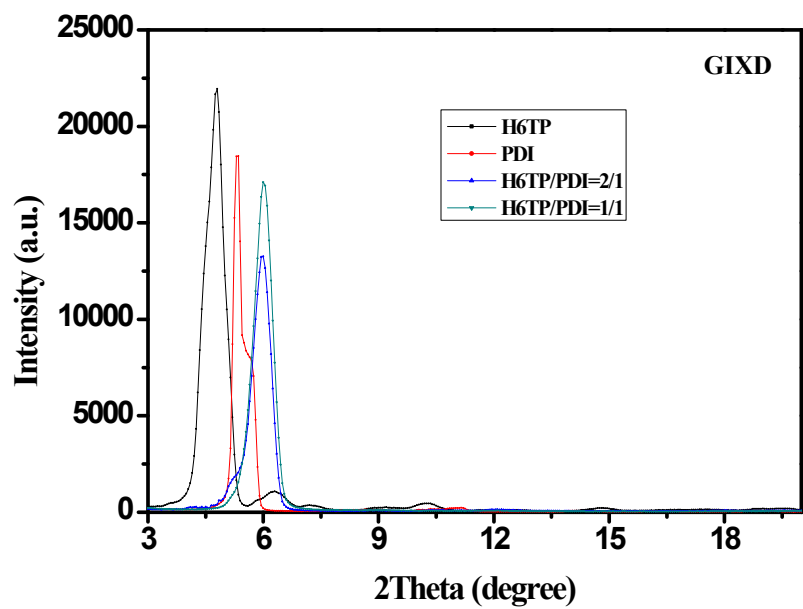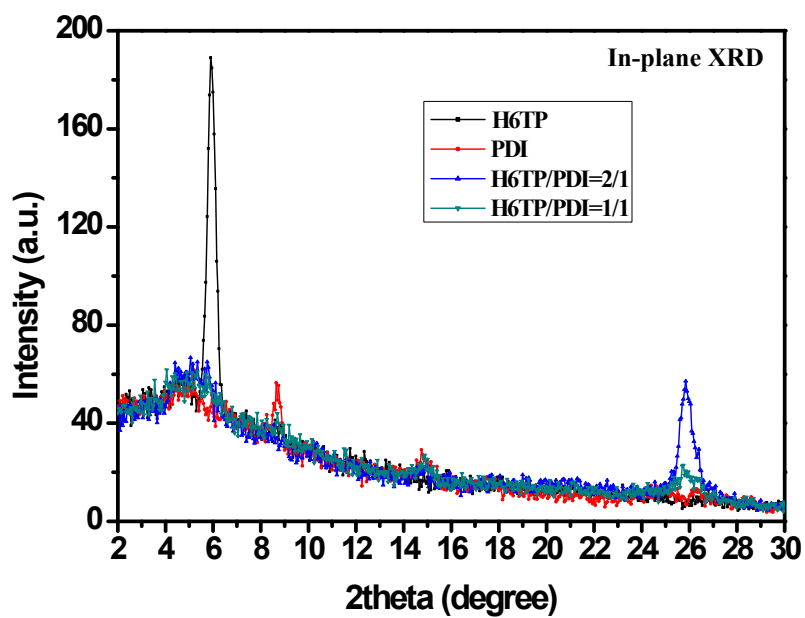

Figure S4. GIXD and in-plane XRD profiles of drop-cast H6TP/EP-PDI films using chlorobenzene as the solvent.

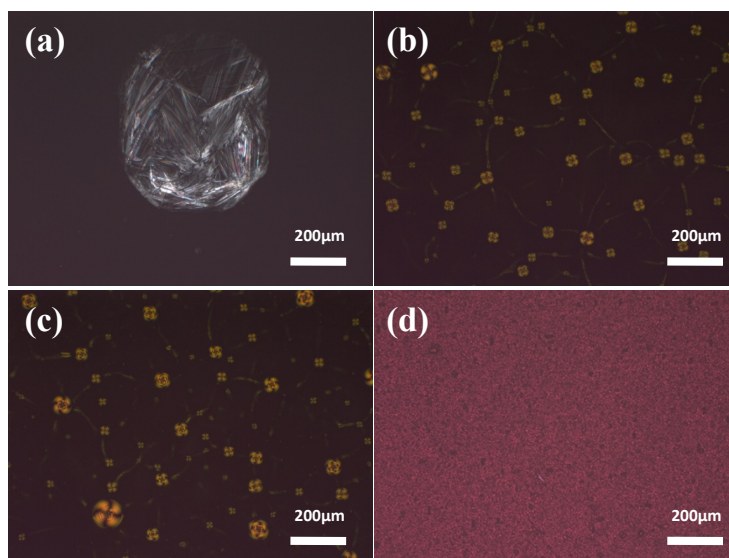

**Figure S5:** POM images of spin-coated H6TP/EP-PDI films using chlorobenzene as the solvent. H6TP/EP-PDI ratios were (a) 1/0, (b) 2/1, (c) 1/1 and (d) 0/1, respectively.

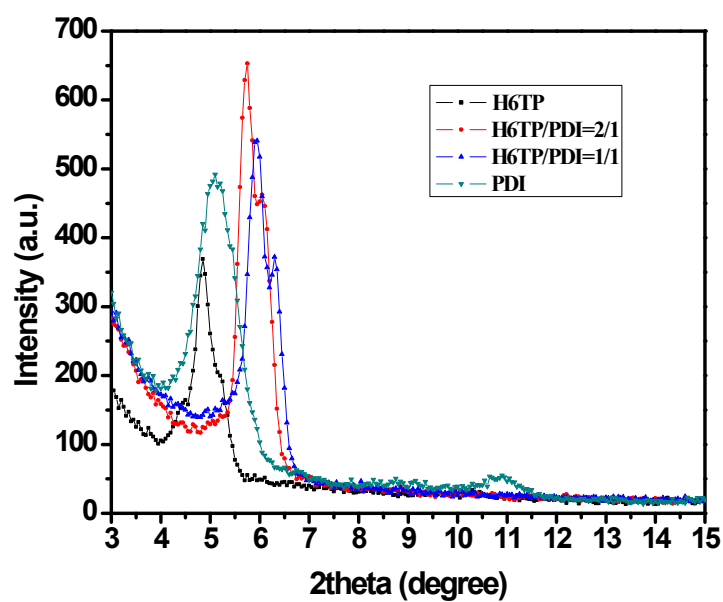

**Figure S6:** GIXD profile of H6TP/EP-PDI films spin-coated from the chlorobenzene solutions.

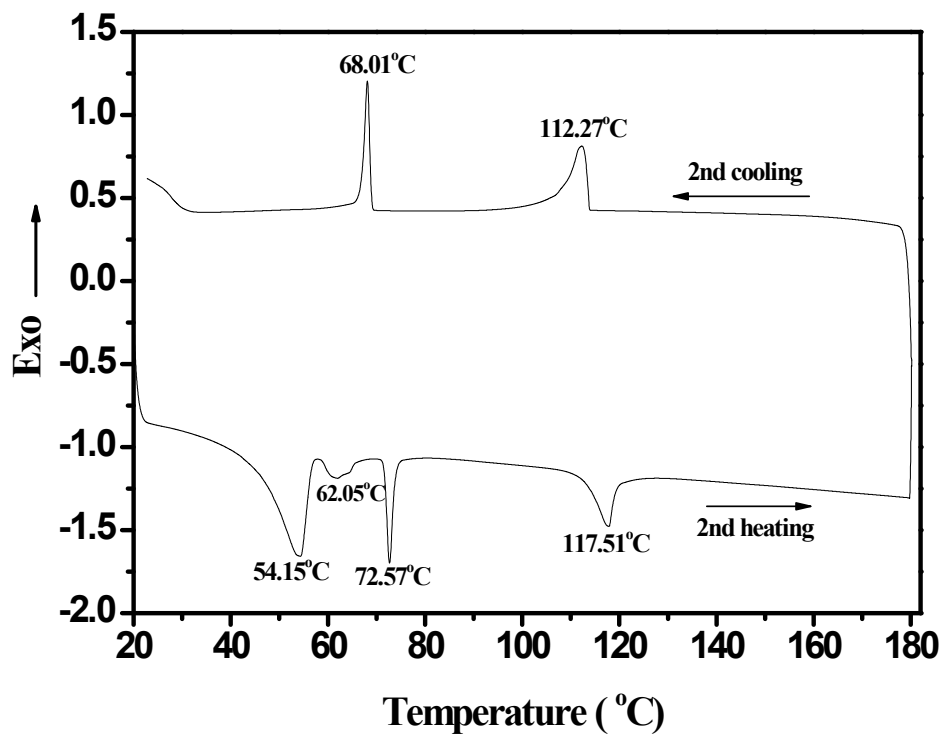

Figure S7. DSC curve of H6TP/EP-PDI (2/1).

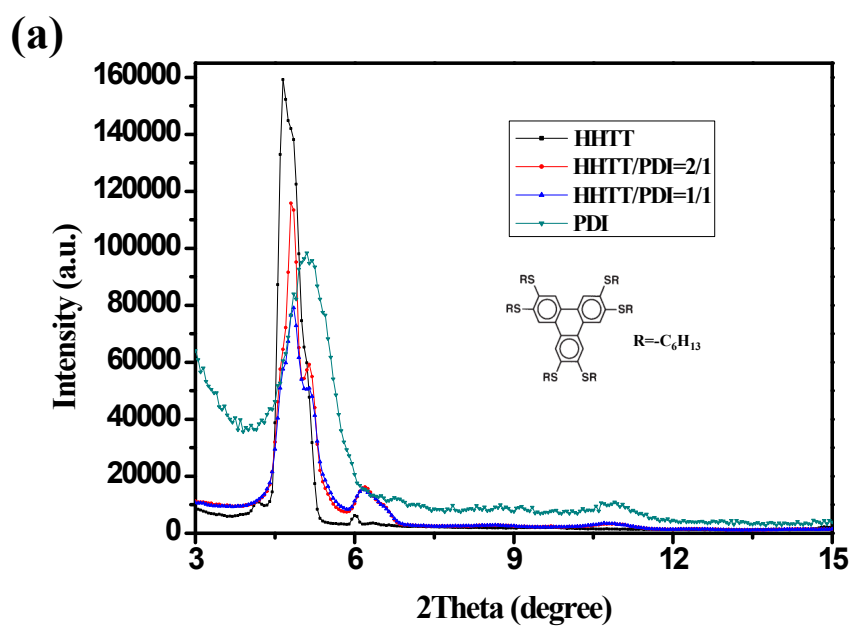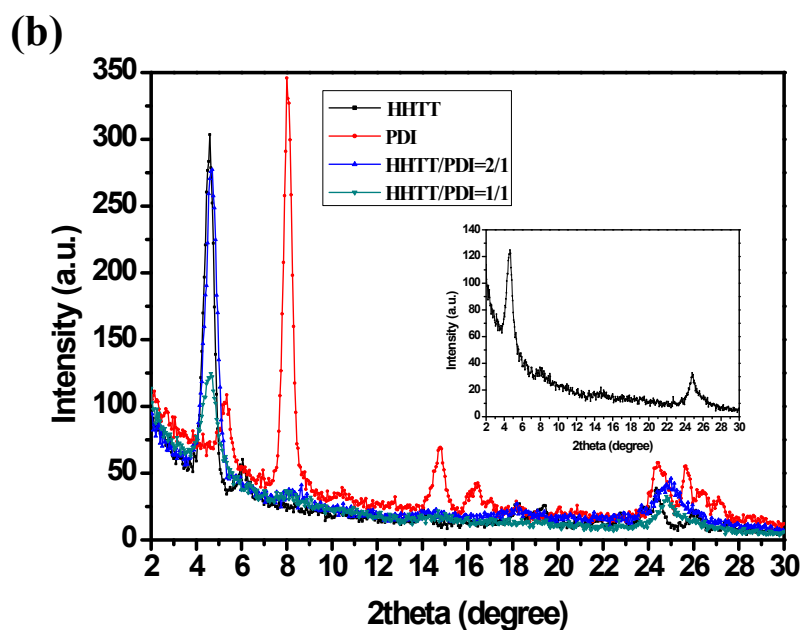

**Figure S8:** (a) GIXD and (b) in-plane XRD profiles of HHTT/EP-PDI films drop-cast from corresponding chloroform solutions (5 mg/ml). The inset in (a) was the chemical structure of HHTT, and the inset in (b) was the in-plane XRD of HHTT/EP-PDI (2/1) film, from which weaker  $\pi$ - $\pi$  stacking ( $2\theta \sim 25^\circ$ ) was observed.
